# Supplementary material
Source: PubMed Central journal article supplement (PMC7984682)

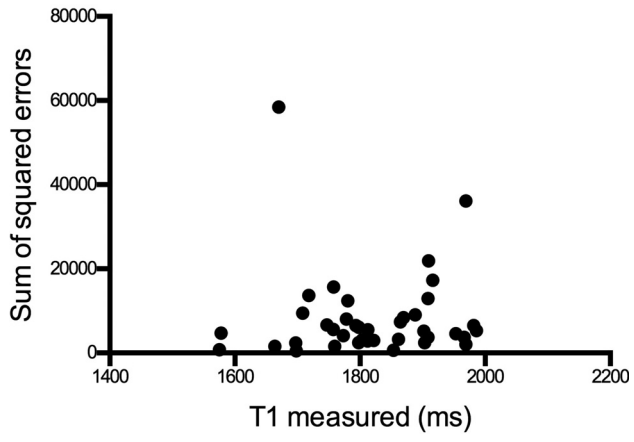

**ON-LINE FIG 1.** Sum of squared errors from fitted  $T1_{\text{blood}}$  data.

Supplement: 4793_figure.pdf [file 4793_figure.pdf]
